# Supplementary material for: Syntheses, characterization, and magnetic properties of novel divalent Co/Ni coordination polymers based on a V-shaped pyridine ligand and dicarboxylate acids
Source: Royal Society of Chemistry journal article supplement (doi:10.1039/c5ra10805e), 2015-01-01
Supplement: c5ra10805e1.pdf [file c5ra10805e1.pdf]

## Syntheses, characterization, and magnetic properties of novel divalent Co/Ni coordination polymers based on a V-shaped pyridine ligand and dicarboxylate acids

Ting Wang, Ling Qin, Chuanlei Zhang and Hegen Zheng\*

*State Key Laboratory of Coordination Chemistry, School of Chemistry and Chemical Engineering, Collaborative Innovation Center of Advanced Microstructures, Nanjing University, Nanjing, 210093, China.*

(P. R. China)

Fax: (+86)25-83314502, E-mail: zhenghg@nju.edu.cn

**Table S1. Selected bond distances and angles for 1.**

|                 |            |                 |            |
|-----------------|------------|-----------------|------------|
| Co(1)-O(6)      | 2.0163(14) | Co(1)-O(4)      | 2.0589(15) |
| Co(1)-O(1)      | 2.1400(14) | Co(1)-N(2)      | 2.1442(17) |
| Co(1)-O(2)      | 2.1475(14) | Co(1)-N(1)      | 2.1648(17) |
| Co(2)-O(8)      | 2.0648(14) | Co(2)-O(8)#1    | 2.0648(14) |
| Co(2)-O(3)      | 2.1384(14) | Co(2)-O(3)#1    | 2.1384(14) |
| Co(2)-N(3)      | 2.1386(17) | Co(2)-N(3)#1    | 2.1387(17) |
| O(6)-Co(1)-O(4) | 175.93(6)  | O(6)-Co(1)-O(1) | 91.27(6)   |
| O(4)-Co(1)-O(1) | 87.81(6)   | O(6)-Co(1)-N(2) | 91.67(7)   |
| O(4)-Co(1)-N(2) | 92.34(7)   | O(1)-Co(1)-N(2) | 93.18(6)   |
| O(6)-Co(1)-O(2) | 91.20(6)   | O(4)-Co(1)-O(2) | 89.58(6)   |
| O(1)-Co(1)-O(2) | 176.75(5)  | N(2)-Co(1)-O(2) | 88.86(6)   |
| O(6)-Co(1)-N(1) | 91.94(7)   | O(4)-Co(1)-N(1) | 84.09(7)   |

|                     |             |                     |            |
|---------------------|-------------|---------------------|------------|
| O(1)-Co(1)-N(1)     | 89.44(6)    | N(2)-Co(1)-N(1)     | 175.49(7)  |
| O(2)-Co(1)-N(1)     | 88.36(6)    | O(8)-Co(2)-O(8)#1   | 180.0      |
| O(8)-Co(2)-O(3)     | 89.53(6)    | O(8)#1-Co(2)-O(3)   | 90.47(6)   |
| O(8)-Co(2)-O(3)#1   | 90.47(6)    | O(8)#1-Co(2)-O(3)#1 | 89.53(6)   |
| O(3)-Co(2)-O(3)#1   | 180.000(19) | O(8)-Co(2)-N(3)     | 86.84(7)   |
| O(8)#1-Co(2)-N(3)   | 93.16(7)    | O(3)-Co(2)-N(3)     | 87.48(6)   |
| O(3)#1-Co(2)-N(3)   | 92.52(6)    | O(8)-Co(2)-N(3)#1   | 93.16(7)   |
| O(8)#1-Co(2)-N(3)#1 | 86.84(7)    | O(3)-Co(2)-N(3)#1   | 92.52(6)   |
| O(3)#1-Co(2)-N(3)#1 | 87.48(6)    | N(3)-Co(2)-N(3)#1   | 180.00(10) |

Symmetry codes: #1 = -x+2, -y+2, -z.

**Table S2. Selected bond distances and angles for 2.**

|                   |            |                     |            |
|-------------------|------------|---------------------|------------|
| Ni(1)-O(4)        | 2.009(2)   | Ni(1)-O(8)          | 2.044(2)   |
| Ni(1)-N(3)#1      | 2.086(3)   | Ni(1)-O(6)          | 2.089(3)   |
| Ni(1)-N(2)        | 2.103(3)   | Ni(1)-O(7)          | 2.105(3)   |
| Ni(2)-O(1)        | 2.057(2)   | Ni(2)-O(1)#2        | 2.057(2)   |
| Ni(2)-N(1)#2      | 2.082(3)   | Ni(2)-N(1)          | 2.082(3)   |
| Ni(2)-O(3)#2      | 2.089(3)   | Ni(2)-O(3)          | 2.089(3)   |
| O(4)-Ni(1)-O(8)   | 176.06(12) | O(4)-Ni(1)-N(3)#1   | 91.67(14)  |
| O(8)-Ni(1)-N(3)#1 | 92.24(14)  | O(4)-Ni(1)-O(6)     | 92.27(10)  |
| O(8)-Ni(1)-O(6)   | 87.11(11)  | N(3)#1-Ni(1)-O(6)   | 92.87(12)  |
| O(4)-Ni(1)-N(2)   | 91.46(12)  | O(8)-Ni(1)-N(2)     | 84.65(12)  |
| N(3)#1-Ni(1)-N(2) | 175.93(14) | O(6)-Ni(1)-N(2)     | 89.61(11)  |
| O(4)-Ni(1)-O(7)   | 89.54(10)  | O(8)-Ni(1)-O(7)     | 90.97(10)  |
| N(3)#1-Ni(1)-O(7) | 88.81(12)  | O(6)-Ni(1)-O(7)     | 177.49(10) |
| N(2)-Ni(1)-O(7)   | 88.60(12)  | O(1)-Ni(2)-O(1)#2   | 180.00(16) |
| O(1)-Ni(2)-N(1)#2 | 93.35(13)  | O(1)#2-Ni(2)-N(1)#2 | 86.65(13)  |

|                     |            |                     |           |
|---------------------|------------|---------------------|-----------|
| O(1)-Ni(2)-N(1)     | 86.65(13)  | O(1)#2-Ni(2)-N(1)   | 93.35(13) |
| N(1)#2-Ni(2)-N(1)   | 180.00(18) | O(1)-Ni(2)-O(3)#2   | 91.22(10) |
| O(1)#2-Ni(2)-O(3)#2 | 88.78(10)  | N(1)#2-Ni(2)-O(3)#2 | 87.31(12) |
| N(1)-Ni(2)-O(3)#2   | 92.69(12)  | O(1)-Ni(2)-O(3)     | 88.78(10) |
| O(1)#2-Ni(2)-O(3)   | 91.22(10)  | N(1)#2-Ni(2)-O(3)   | 92.69(12) |
| N(1)-Ni(2)-O(3)     | 87.31(12)  | O(3)#2-Ni(2)-O(3)   | 180.0     |

Symmetry codes: #1 =  $x, -y - 1/2, z + 1/2$ ; #2 =  $-x + 1, -y + 1, -z$ .

**Table S3. Selected bond distances and angles for 3.**

|                     |            |                   |            |
|---------------------|------------|-------------------|------------|
| Co(1)-O(1)          | 1.991(3)   | Co(1)-O(2)#1      | 2.002(3)   |
| Co(1)-N(3)          | 2.143(3)   | Co(1)-N(1)#3      | 2.155(4)   |
| Co(1)-O(3)          | 2.175(4)   | Co(1)-O(4)        | 2.273(4)   |
| O(1)-Co(1)-O(2)#1   | 122.53(14) | O(1)-Co(1)-N(3)   | 91.14(13)  |
| O(2)#1-Co(1)-N(3)   | 86.19(13)  | O(1)-Co(1)-N(1)#3 | 94.06(13)  |
| O(2)#1-Co(1)-N(1)#3 | 89.80(14)  | N(3)-Co(1)-N(1)#3 | 174.61(14) |
| O(1)-Co(1)-O(3)     | 145.70(14) | O(2)#1-Co(1)-O(3) | 91.73(13)  |
| N(3)-Co(1)-O(3)     | 89.37(14)  | N(1)#3-Co(1)-O(3) | 87.16(14)  |
| O(1)-Co(1)-O(4)     | 88.70(13)  | O(2)#1-Co(1)-O(4) | 147.63(13) |
| N(3)-Co(1)-O(4)     | 84.80(14)  | N(1)#3-Co(1)-O(4) | 96.75(15)  |
| O(3)-Co(1)-O(4)     | 57.19(13)  |                   |            |

Symmetry codes: #1 =  $-x + 1, -y + 2, -z + 1$ ; #3 =  $x - 1, -y + 2, z - 1/2$ .

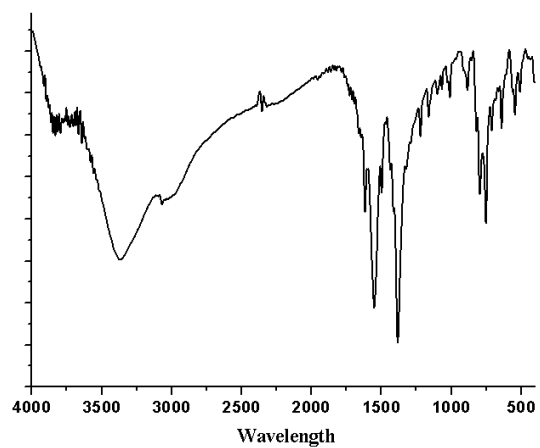

(1)

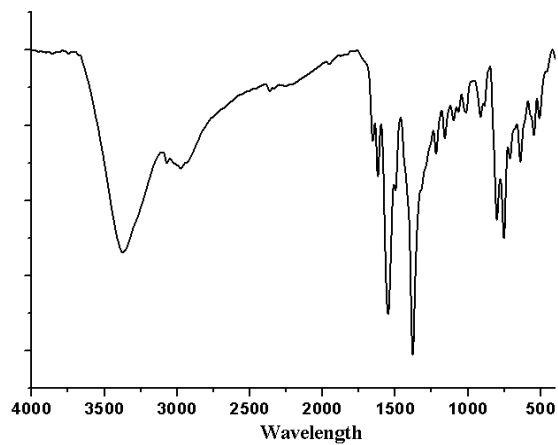

(2)

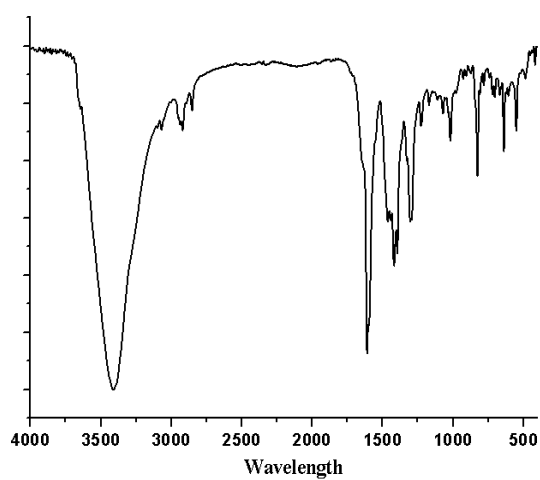

(3)

**Fig. S1** IR spectra of compounds 1-3.

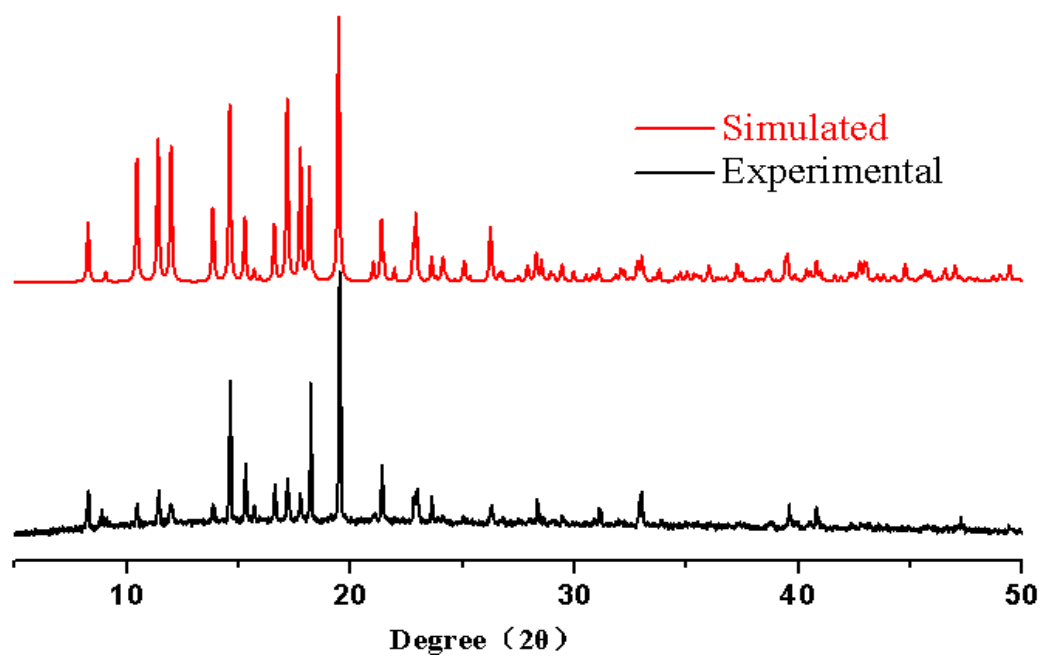

Fig. S2 Powder X-ray diffraction patterns of compound 1.

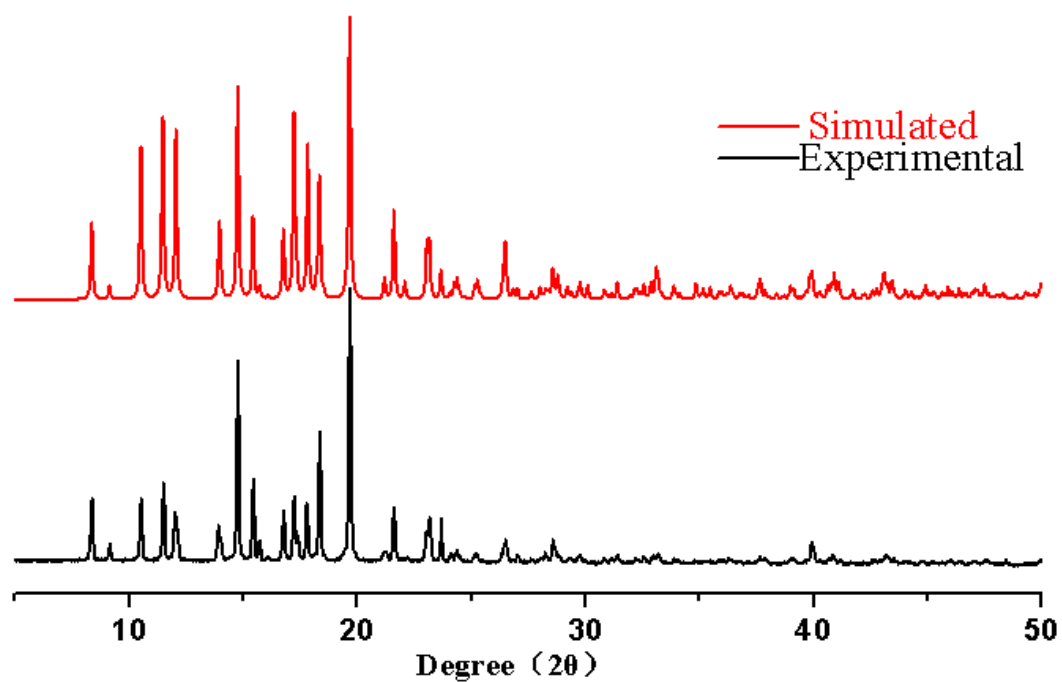

Fig. S3 Powder X-ray diffraction patterns of compound 2.

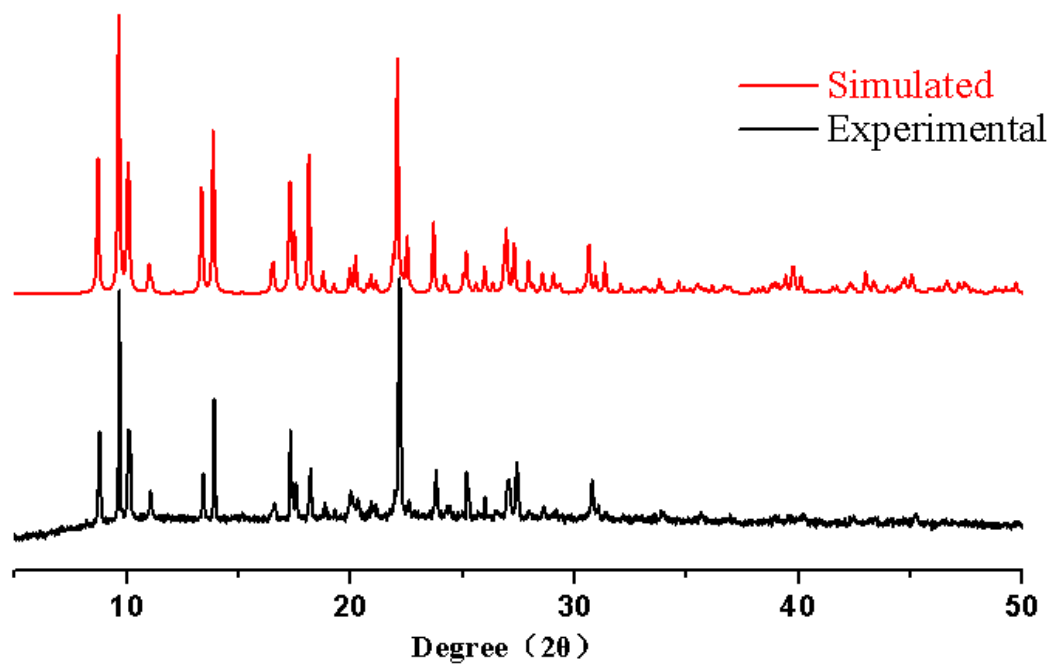

Fig. S4 Powder X-ray diffraction patterns of compound 3.

Fig. S5 Coordination environment of the Ni(II) cation in 2. The hydrogen atoms are omitted for clarity. Symmetry codes: #1 =  $x, -1/2-y, 1/2+z$ .

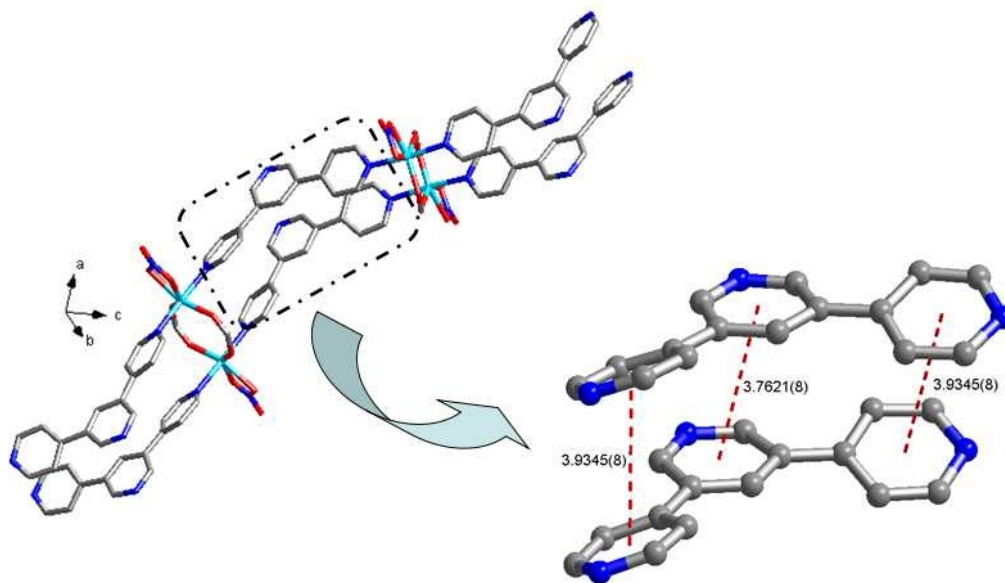

**Fig. S6** The weak  $\pi \cdots \pi$  stacking interactions (centroid-to-centroid distance of 3.7621(8) and 3.9345(8) Å) among adjacent pyridine cycles of BPYPY ligands in compound **3**.
